# Supplementary material for: Sarcopenia and sarcopenic obesity among older adults in the nordic countries: a scoping review
Source: PubMed Central journal article supplement (PMC11092005; doi:10.1186/s12877-024-04970-x), 2024-05-13
Supplement: 12877_2024_4970_MOESM1_ESM.pdf [file 12877_2024_4970_MOESM1_ESM.pdf]

**Appendix 1:** Search strategy for scoping review on sarcopenia and sarcopenic obesity in the Nordic countries

| Database | Search syntax                                                                                                                                                                                                                                                                                                                                                                                                                                                                                                                                                                                                                                                                                                                                                                                         |
|----------|-------------------------------------------------------------------------------------------------------------------------------------------------------------------------------------------------------------------------------------------------------------------------------------------------------------------------------------------------------------------------------------------------------------------------------------------------------------------------------------------------------------------------------------------------------------------------------------------------------------------------------------------------------------------------------------------------------------------------------------------------------------------------------------------------------|
| PubMed   | <p>((("old population*" OR senior* OR "aged"[MeSH Terms] OR "aged"[Title/Abstract] OR "elderl*" [Title/Abstract] OR "old people"[Title/Abstract] OR "over 65"[Title/Abstract] OR "old person*" [Title/Abstract]) AND (obes* OR "overweight"[MeSH Terms] OR overweight* OR adipos* OR "adiposity"[MeSH Terms] OR "excessive weight" OR "obesity paradox" OR "sarcopenic obesit*")) AND (("sarcopenia"[MeSH Terms] OR "sarcopeni*" [Title/Abstract] OR "muscle atroph*" [Title/Abstract] OR "muscle wast*" [Title/Abstract] OR "muscle weak*" [Title/Abstract] OR "muscle los*" [Title/Abstract]))</p> <p><b>Results: 2024</b></p>                                                                                                                                                                      |
| Embase   | <ol style="list-style-type: none"> <li>1) Old population*.mp.</li> <li>2) Aged/</li> <li>3) elderl*.mp. or very elderly/</li> <li>4) old people.mp.</li> <li>5) over 65.mp.</li> <li>6) old person*.mp.</li> <li>7) 1 or 2 or 3 or 4 or 6</li> <li>8) obesity/ or obes*.mp.</li> <li>9) obesity/ or overweight*.mp.</li> <li>10) excessive weight.mp.</li> <li>11) obesity paradox.mp.</li> <li>12) 8 or 9 or 10 or 11</li> <li>13) muscle atrophy/ or muscle atrophy*.mp.</li> <li>14) geriatric disorder/</li> <li>15) sarcopeni*.mp.</li> <li>16) sarcopenia/</li> <li>17) muscle wast*.mp.</li> <li>18) muscle weakness/ or muscle weak*.mp.</li> <li>19) muscle los*.mp.</li> <li>20) 13 or 14 or 15 or 16 or 17 or 18 or 19</li> <li>21) 7 and 12 and 20</li> </ol> <p><b>Results: 2437</b></p> |
| ISI/WOS  | <p>((ALL= ("old population*" OR senior* OR "aged" OR "elderl*" OR "old people" OR "over 65" OR "old person*")) AND ALL=((obes* OR "overweight*" OR adipos* OR "excessive weight" OR "obesity paradox" )) AND ALL=(( "sarcopeni*" OR "muscle atroph*" OR "muscle wast*" OR "muscle weak*" OR "muscle los*"))</p> <p><b>Results: 1897</b></p>                                                                                                                                                                                                                                                                                                                                                                                                                                                           |
